# Supplementary material for: Prevalence and Risk Factors of Infection with High Risk Human Papilloma Viruses among HIV-Positive Women with Clinical Manifestations of Tuberculosis in a Middle-Income Country
Source: MDPI journal article supplement (doi:10.3390/biomedicines9060683), 2021-06-16
Supplement: s1 [file s1]

## **SUPPLEMENTARY DATA**

**Supplementary Table 1.** Characteristics of the control group of women living with HIV-1 (WLWH) uninfected with *M. tuberculosis* (MTB) (n=50) compared to the study group of WLWH with TB (n=58). CD4+ counts of two patients in the study group by the time of analysis were not available.

**Supplementary Table 2. Comparison of demographic and clinical parameters in the control group of WLWH without TB (n=50) depending on the stage of HIV-1 infection.** Stage is defined as 3 or 4 (includes 4A, 4B, 4C by the criteria of the Ministry of Health of the Russian Federation). Mann-Whitney U Test; marked tests are significant at  $p < .05000$  (Statistica Axa 11).

**Supplementary Table 3. Comparison of prevalence of HR HPVs and multiplicity of HR HPV infection in WLWH with TB naïve to treatment, and receiving ART.** Patients grouped as receiving NRTI + 1(2) NNRTI, or NRT I+ 1(2) PI. Mann-Whitney U Test (with continuity correction) by variable ART regimen. Marked tests are significant at  $p < .05000$

**Supplementary Table 4. Comparison of demographic and clinical parameters in the control group of WLWH without TB (n=50) depending ART treatment status.** Group 1, WLWH naïve to treatment or treated 1 month or less (n=5); Group 2 (n=45), WLWH on ART. Mann-Whitney U Test; marked tests are significant at  $p < .05000$

**Supplementary Figure 1.** Phylogenetic trees for E5 (A) and E6/E7 (B) genes of HPV 16 strains isolated from HIV/TB-infected women (MT353690-MT353699, MT353701- MT353712). Tree branches with reliability level of 90% and higher are depicted in red.

**Supplementary Figure 2. Prevalence of HR HPVs in TB- negative WLWH (n=50) in relation to the demographic and clinical parameters of the group.** Correlation of HR HPV DNA detected in cervical smears with the duration of life with HIV-1, but not age or CD4+ T cell counts at the time of analysis (A); Distribution of HR HPVs in different age categories (B); Distribution of HR HPVs in

relation to the immune status of WLWH reflected by CD4+ T cell counts by the time of sampling (C). p values are indicated in the figure panels, Kruskal Wallis test (Statistica Axa 11).

**Supplementary Fig. 3.** Positivity for HR HPVs (A), HPV 16 (B), HR HPVs other than HPV 16 (C), number of infecting HR HPV types (D) and of infecting HR HPV types other than HPV 16 (E) in HIV/TB-infected women receiving NRTI+1(2) NNRTI, NRTI+1(2) PI, or untreated. Kruskal Wallis test.

## SUPPLEMENTARY TABLES

**Supplementary Table 1.** Characteristics of the control group of women living with HIV-1 (WLWH) without clinical manifestations of TB (n=50) compared to the study group of WLWH with TB (n=58). CD4+ counts of two patients in the study group by the time of analysis were not recorded. \*, significant in difference test; ns, not significant (Statistica 11).

| Parameter                                               | Control group,<br>n (%) | Study group,<br>n (%) | Statistical<br>significance<br>of difference |
|---------------------------------------------------------|-------------------------|-----------------------|----------------------------------------------|
| <b>Age (full years)</b>                                 |                         |                       |                                              |
| 21-29                                                   | 5 (10)                  | 9 (15,5)              | ns                                           |
| 30-39                                                   | 33 (66)                 | 34 (58,6)             | ns                                           |
| 40-49                                                   | 10 (20)                 | 14 (24,1)             | ns                                           |
| ≥ 60                                                    | 2 (4)                   | 1 (1,7)               | ns                                           |
| <b>CD4 T cell counts (cells/mm<sup>3</sup>)</b>         |                         |                       |                                              |
| ≥ 399                                                   | 28 (56)                 | 11 (18,9)*            | p=0,0001                                     |
| 200-399                                                 | 9 (18)                  | 15 (25,9)             | ns                                           |
| ≤ 200                                                   | 8 (16)                  | 12 (20,7)             | ns                                           |
| ≤ 67                                                    | 5 (10)                  | 20 (34,5)*            | p=0,0026                                     |
| <b>Antiretroviral treatment (ART)</b>                   |                         |                       |                                              |
| untreated                                               | 2 (4)                   | 21 (36,2)*            | p=0,0002                                     |
| treated (≤1 month)                                      | 3 (6)                   | 6 (10,3)              | ns                                           |
| treated (>1 month)                                      | 45 (90)                 | 31 (53,4)*            | p=0,0001                                     |
| treatment duration in those<br>treated >1 month (years) | 2.1±3.0                 | 2.7±2.2               | ns                                           |

**Supplementary Table 2. Comparison of demographic and clinical parameters in the control group of WLWH without TB (n=50) depending on the stage of HIV-1 infection.** Stage is defined as 3 or 4 (includes 4A, 4B, 4C by the criteria of the Ministry of Health of the Russian Federation). Mann-Whitney U Test; marked tests are significant at p <.05000 (Statistica Axa 11).

| Parameter                                            | Rank Sum<br>(Stage 3) | Rank Sum<br>(Stage 4) | U        | Z        | p-value  | Z (adjusted) | p-value  | Valid N<br>(Stage 3) | Valid N<br>(Stage 4) | 2*1sided<br>(exact p) |
|------------------------------------------------------|-----------------------|-----------------------|----------|----------|----------|--------------|----------|----------------------|----------------------|-----------------------|
| Age                                                  | 414.0000              | 861.0000              | 183.0000 | -2.37839 | 0.017389 | -2.38486     | 0.017086 | 21                   | 29                   | 0.016412              |
| <i>Clinical data</i>                                 |                       |                       |          |          |          |              |          |                      |                      |                       |
| Years with HIV                                       | 505.0000              | 770.0000              | 274.0000 | -0.58968 | 0.555404 | -0.59389     | 0.552586 | 21                   | 29                   | 0.558708              |
| CD4 at sampling                                      | 536.0000              | 640.0000              | 205.0000 | 1.47576  | 0.140010 | 1.47576      | 0.140010 | 19                   | 29                   | 0.141133              |
| CD4 nadir                                            | 595.5000              | 580.5000              | 145.5000 | 2.73015  | 0.006331 | 2.73030      | 0.006328 | 19                   | 29                   | 0.005329              |
| ART at sampling                                      | 517.0000              | 758.0000              | 286.0000 | -0.35381 | 0.723482 | -0.85997     | 0.389807 | 21                   | 29                   | 0.725876              |
| ART duration, years                                  | 370.5000              | 805.5000              | 180.5000 | -1.99227 | 0.046342 | -1.99487     | 0.046058 | 19                   | 29                   | 0.044436              |
| <i>Presence in cervical smear of HPV DNA</i>         |                       |                       |          |          |          |              |          |                      |                      |                       |
| HPV16                                                | 517.5000              | 757.5000              | 286.5000 | -0.34398 | 0.730861 | -0.42566     | 0.670359 | 21                   | 29                   | 0.725876              |
| HPV18                                                | 579.0000              | 696.0000              | 261.0000 | 0.84521  | 0.397993 | 2.05437      | 0.039941 | 21                   | 29                   | 0.401409              |
| HPV31                                                | 529.0000              | 746.0000              | 298.0000 | -0.11794 | 0.906118 | -0.28666     | 0.774376 | 21                   | 29                   | 0.906993              |
| HPV33                                                | 526.5000              | 748.5000              | 295.5000 | -0.16708 | 0.867310 | -0.26307     | 0.792498 | 21                   | 29                   | 0.860877              |
| HPV35                                                | 529.0000              | 746.0000              | 298.0000 | -0.11794 | 0.906118 | -0.28666     | 0.774376 | 21                   | 29                   | 0.906993              |
| HPV39                                                | 535.5000              | 739.5000              | 304.5000 | 0.00983  | 0.992158 |              |          | 21                   | 29                   |                       |
| HPV45                                                | 514.5000              | 760.5000              | 283.5000 | -0.40295 | 0.686986 | -1.18696     | 0.235243 | 21                   | 29                   | 0.682459              |
| HPV52                                                | 529.0000              | 746.0000              | 298.0000 | -0.11794 | 0.906118 | -0.28666     | 0.774376 | 21                   | 29                   | 0.906993              |
| HPV56                                                | 591.0000              | 684.0000              | 249.0000 | 1.08108  | 0.279660 | 1.62431      | 0.104311 | 21                   | 29                   | 0.282466              |
| HPV58                                                | 491.0000              | 784.0000              | 260.0000 | -0.86487 | 0.387112 | -1.29945     | 0.193791 | 21                   | 29                   | 0.390500              |
| HPV59                                                | 514.5000              | 760.5000              | 283.5000 | -0.40295 | 0.686986 | -1.18696     | 0.235243 | 21                   | 29                   | 0.682459              |
| HPV66                                                | 535.5000              | 739.5000              | 304.5000 | 0.00983  | 0.992158 |              |          | 21                   | 29                   |                       |
| HR HPV (-)                                           | 545.0000              | 730.0000              | 295.0000 | 0.17690  | 0.859583 | 0.24651      | 0.805288 | 21                   | 29                   | 0.860877              |
| HR HPV (+)                                           | 526.0000              | 749.0000              | 295.0000 | -0.17690 | 0.859583 | -0.24651     | 0.805288 | 21                   | 29                   | 0.860877              |
| HR HPV other than HPV16 (+)                          | 515.5000              | 759.5000              | 284.5000 | -0.38329 | 0.701502 | -0.55313     | 0.580178 | 21                   | 29                   | 0.696825              |
| HPV16 and other (+)                                  | 526.5000              | 748.5000              | 295.5000 | -0.16708 | 0.867310 | -0.26307     | 0.792498 | 21                   | 29                   | 0.860877              |
| >1 HR HPV                                            | 534.5000              | 740.5000              | 303.5000 | -0.00983 | 0.992158 | -0.01328     | 0.989402 | 21                   | 29                   | 0.984465              |
| >2 HR HPVs                                           | 522.5000              | 752.5000              | 291.5000 | -0.24570 | 0.805914 | -0.43644     | 0.662516 | 21                   | 29                   | 0.800131              |
| Number of infecting HR HPVs                          | 523.5000              | 751.5000              | 292.5000 | -0.22604 | 0.821167 | -0.24819     | 0.803985 | 21                   | 29                   | 0.815222              |
| Number of multiple HR HPV infections including HPV16 | 537.5000              | 737.5000              | 302.5000 | 0.02948  | 0.976479 | 0.03198      | 0.974489 | 21                   | 29                   | 0.968936              |

**Supplementary Table 3. Comparison of prevalence of HR HPVs and multiplicity of HR HPV infection in WLWH with TB naïve to treatment, and receiving ART.**

Patients grouped as receiving NRTI + 1(2) NNRTI, or NRTI + 1(2) PI. Mann-Whitney U Test (with continuity correction) by variable ART regimen. Marked tests are significant at  $p < .05000$

| Treatment naïve (n=27) versus treated with NRTI+1(2)NNRTI (n=20)            |                                  |                              |        |       |         |                 |         |                                 |                         |                       |
|-----------------------------------------------------------------------------|----------------------------------|------------------------------|--------|-------|---------|-----------------|---------|---------------------------------|-------------------------|-----------------------|
| variable                                                                    | Rank Sum<br>(treatment<br>naïve) | Rank Sum<br>(NRTI+NNR<br>TI) | U      | Z     | p-value | Z<br>(adjusted) | p-value | Valid N<br>(treatment<br>naïve) | Valid N<br>(NRTI+NNRTI) | 2*1sided<br>(exact p) |
| HR HPV positivity<br>(Y=1/N=0)                                              | 639.50                           | 488.50                       | 261.50 | -0.17 | 0.86    | -0.20           | 0.84    | 27.00                           | 20.00                   | 0.86                  |
| Positivity for HPV 16                                                       | 677.00                           | 451.00                       | 241.00 | 0.61  | 0.54    | 0.74            | 0.46    | 27.00                           | 20.00                   | 0.54                  |
| nn HR HPVs                                                                  | 595.50                           | 532.50                       | 217.50 | -1.12 | 0.26    | -1.22           | 0.22    | 27.00                           | 20.00                   | 0.26                  |
| Positivity for HR HPVs<br>other than HPV 16<br>(Y=1/N=0)                    | 553.00                           | 575.00                       | 175.00 | -2.03 | 0.04    | -2.57           | 0.01    | 27.00                           | 20.00                   | 0.04                  |
| Summ of HR HPVs other<br>than HPV 16                                        | 547.00                           | 581.00                       | 169.00 | -2.16 | 0.03    | -2.70           | 0.01    | 27.00                           | 20.00                   | 0.03                  |
| >=2 HR HPVs<br>(Y=1/N=0)                                                    | 563.50                           | 564.50                       | 185.50 | -1.81 | 0.07    | -2.78           | 0.01    | 27.00                           | 20.00                   | 0.07                  |
| Treatment naïve (n=27) versus treated with NRTI+1(2)PI (n=11)               |                                  |                              |        |       |         |                 |         |                                 |                         |                       |
| variable                                                                    | Rank Sum<br>(treatment<br>naïve) | Rank Sum<br>(NRTI+PI)        | U      | Z     | p-value | Z<br>(adjusted) | p-value | Valid N<br>(treatment<br>naïve) | Valid N<br>(NRTI+PI)    | 2*1sided<br>(exact p) |
| HR HPV positivity<br>(Y=1/N=0)                                              | 482.00                           | 259.00                       | 104.00 | -1.42 | 0.16    | -1.67           | 0.09    | 27.00                           | 11.00                   | 0.16                  |
| Positivity for HPV 16                                                       | 519.50                           | 221.50                       | 141.50 | -0.21 | 0.83    | -0.24           | 0.81    | 27.00                           | 11.00                   | 0.82                  |
| nn HR HPVs                                                                  | 458.50                           | 282.50                       | 80.50  | -2.17 | 0.03    | -2.38           | 0.02    | 27.00                           | 11.00                   | 0.03                  |
| Positivity for HR HPVs<br>other than HPV 16<br>(Y=1/N=0)                    | 454.00                           | 287.00                       | 76.00  | -2.32 | 0.02    | -2.95           | 0.00    | 27.00                           | 11.00                   | 0.02                  |
| Summ of HR HPVs other<br>than HPV 16                                        | 452.00                           | 289.00                       | 74.00  | -2.38 | 0.02    | -3.02           | 0.00    | 27.00                           | 11.00                   | 0.02                  |
| >=2 HR HPV (Y=1/N=0)                                                        | 478.00                           | 263.00                       | 100.00 | -1.54 | 0.12    | -2.64           | 0.01    | 27.00                           | 11.00                   | 0.12                  |
| Treatment with NRTI+1(2)NNRTI (n=20) versus treated with NRTI+1(2)PI (n=11) |                                  |                              |        |       |         |                 |         |                                 |                         |                       |
| variable                                                                    | Rank Sum<br>(NRTI+NNR<br>TI)     | Rank Sum<br>(NRTI+PI)        | U      | Z     | p-value | Z<br>(adjusted) | p-value | Valid N<br>(NRTI+NNR<br>TI)     | Valid N<br>(NRTI+PI)    | 2*1sided<br>(exact p) |
| HR HPV positivity<br>(Y=1/N=0)                                              | 290.50                           | 205.50                       | 80.50  | -1.20 | 0.23    | -1.44           | 0.15    | 20.00                           | 11.00                   | 0.23                  |
| Positivity for HPV 16                                                       | 303.00                           | 193.00                       | 93.00  | -0.68 | 0.50    | -0.82           | 0.41    | 20.00                           | 11.00                   | 0.50                  |
| nn HR HPVs                                                                  | 302.00                           | 194.00                       | 92.00  | -0.72 | 0.47    | -0.76           | 0.45    | 20.00                           | 11.00                   | 0.48                  |
| Positivity for HR HPVs<br>other than HPV 16<br>(Y=1/N=0)                    | 305.00                           | 191.00                       | 95.00  | -0.60 | 0.55    | -0.69           | 0.49    | 20.00                           | 11.00                   | 0.56                  |
| Summ of HR HPVs other<br>than HPV 16                                        | 310.50                           | 185.50                       | 100.50 | -0.37 | 0.71    | -0.41           | 0.68    | 20.00                           | 11.00                   | 0.70                  |
| >=2 HR HPV (Y=1/N=0)                                                        | 318.50                           | 177.50                       | 108.50 | -0.04 | 0.97    | -0.05           | 0.96    | 20.00                           | 11.00                   | 0.95                  |

**Supplementary Table 4. Comparison of demographic and clinical parameters in the control group of WLWH without TB (n=50) depending ART treatment status.**

Group 1, WLWH naïve to treatment or treated 1 month or less (n=5); Group 2 (n=45), WLWH on ART. Mann-Whitney U Test; marked tests are significant at  $p < .05000$ .

| Variable                                     | Rank Sum<br>(Group 1) | Rank Sum<br>(Group 2) | U        | Z        | p-value  | Z (adjusted) | p-value  | Valid N<br>(Group 1) | Valid N<br>(Group 2) | 2*1sided<br>(exact p) |
|----------------------------------------------|-----------------------|-----------------------|----------|----------|----------|--------------|----------|----------------------|----------------------|-----------------------|
| Age                                          | 134.0000              | 1141.000              | 106.0000 | 0.19403  | 0.846154 | 0.19456      | 0.845740 | 5                    | 45                   | 0.850839              |
| <i>Clinical data</i>                         |                       |                       |          |          |          |              |          |                      |                      |                       |
| Stage 3 vs Stage 4                           | 105.0000              | 1170.000              | 90.0000  | -0.71144 | 0.476813 | -0.83205     | 0.405380 | 5                    | 45                   | 0.488327              |
| Years with HIV                               | 126.5000              | 1148.500              | 111.5000 | -0.01617 | 0.987100 | -0.01628     | 0.987008 | 5                    | 45                   | 0.975008              |
| CD4 status at sampling                       | 93.5000               | 1082.500              | 47.5000  | 0.83054  | 0.406234 | 0.94521      | 0.344555 | 3                    | 45                   | 0.412697              |
| CD4 nadir                                    | 40.0000               | 1136.000              | 34.0000  | -1.40553 | 0.159865 | -1.40560     | 0.159842 | 3                    | 45                   | 0.168941              |
| ART duration, years                          | 51.0000               | 1125.000              | 45.0000  | -0.93702 | 0.348750 | -0.93824     | 0.348121 | 3                    | 45                   | 0.365865              |
| <i>Presence in cervical smear of HPV DNA</i> |                       |                       |          |          |          |              |          |                      |                      |                       |
| HPV16                                        | 162.5000              | 1112.500              | 77.5000  | 1.11566  | 0.264567 | 1.38056      | 0.167414 | 5                    | 45                   | 0.266694              |
| HPV18                                        | 120.0000              | 1155.000              | 105.0000 | -0.22637 | 0.820916 | -0.55021     | 0.582179 | 5                    | 45                   | 0.826320              |
| HPV31                                        | 120.0000              | 1155.000              | 105.0000 | -0.22637 | 0.820916 | -0.55021     | 0.582179 | 5                    | 45                   | 0.826320              |
| HPV33                                        | 157.5000              | 1117.500              | 82.5000  | 0.95397  | 0.340098 | 1.50207      | 0.133081 | 5                    | 45                   | 0.342661              |
| HPV35                                        | 120.0000              | 1155.000              | 105.0000 | -0.22637 | 0.820916 | -0.55021     | 0.582179 | 5                    | 45                   | 0.826320              |
| HPV39                                        | 127.5000              | 1147.500              | 112.5000 | 0.01617  | 0.987100 |              |          | 5                    | 45                   |                       |
| HPV45                                        | 122.5000              | 1152.500              | 107.5000 | -0.14552 | 0.884299 | -0.42866     | 0.668170 | 5                    | 45                   | 0.875492              |
| HPV52                                        | 120.0000              | 1155.000              | 105.0000 | -0.22637 | 0.820916 | -0.55021     | 0.582179 | 5                    | 45                   | 0.826320              |
| HPV56                                        | 105.0000              | 1170.000              | 90.0000  | -0.71144 | 0.476813 | -1.06892     | 0.285105 | 5                    | 45                   | 0.488327              |
| HPV58                                        | 130.0000              | 1145.000              | 110.0000 | 0.06468  | 0.948432 | 0.09717      | 0.922588 | 5                    | 45                   | 0.950039              |
| HPV59                                        | 122.5000              | 1152.500              | 107.5000 | -0.14552 | 0.884299 | -0.42866     | 0.668170 | 5                    | 45                   | 0.875492              |
| HPV66                                        | 127.5000              | 1147.500              | 112.5000 | 0.01617  | 0.987100 |              |          | 5                    | 45                   |                       |
| Summ HR HPV's                                | 139.0000              | 1136.000              | 101.0000 | 0.35572  | 0.722051 | 0.39057      | 0.696113 | 5                    | 45                   | 0.730016              |
| Other HR HPV's (Y=1/N=0)                     | 102.5000              | 1172.500              | 87.5000  | -0.79228 | 0.428196 | -1.14333     | 0.252901 | 5                    | 45                   | 0.430343              |
| Count if >1                                  | 147.5000              | 1127.500              | 92.5000  | 0.63059  | 0.528307 | 0.85229      | 0.394052 | 5                    | 45                   | 0.529075              |
| Count if 0                                   | 125.0000              | 1150.000              | 110.0000 | -0.06468 | 0.948432 | -0.09012     | 0.928189 | 5                    | 45                   | 0.950039              |
| HPV16+another                                | 108.0000              | 1167.000              | 93.0000  | -0.61442 | 0.538936 | -0.66640     | 0.505154 | 5                    | 45                   | 0.550041              |
| HPV16+another (Y=1/N=0)                      | 132.5000              | 1142.500              | 107.5000 | 0.14552  | 0.884299 | 0.22913      | 0.818769 | 5                    | 45                   | 0.875492              |
| Count if >2                                  | 112.5000              | 1162.500              | 97.5000  | -0.46890 | 0.639140 | -0.83292     | 0.404891 | 5                    | 45                   | 0.637526              |
| Any HR HPV                                   | 130.0000              | 1145.000              | 110.0000 | 0.06468  | 0.948432 | 0.09012      | 0.928189 | 5                    | 45                   | 0.950039              |

## SUPPLEMENTARY FIGURES

**Supplementary Fig. 1.** Phylogenetic trees for E5 (A) and E6/E7 (B) genes of HPV 16 strains isolated from HIV/TB-infected women (MT353690-MT353699, MT353701- MT353712). Tree branches with reliability level of 90% and higher are depicted in red.

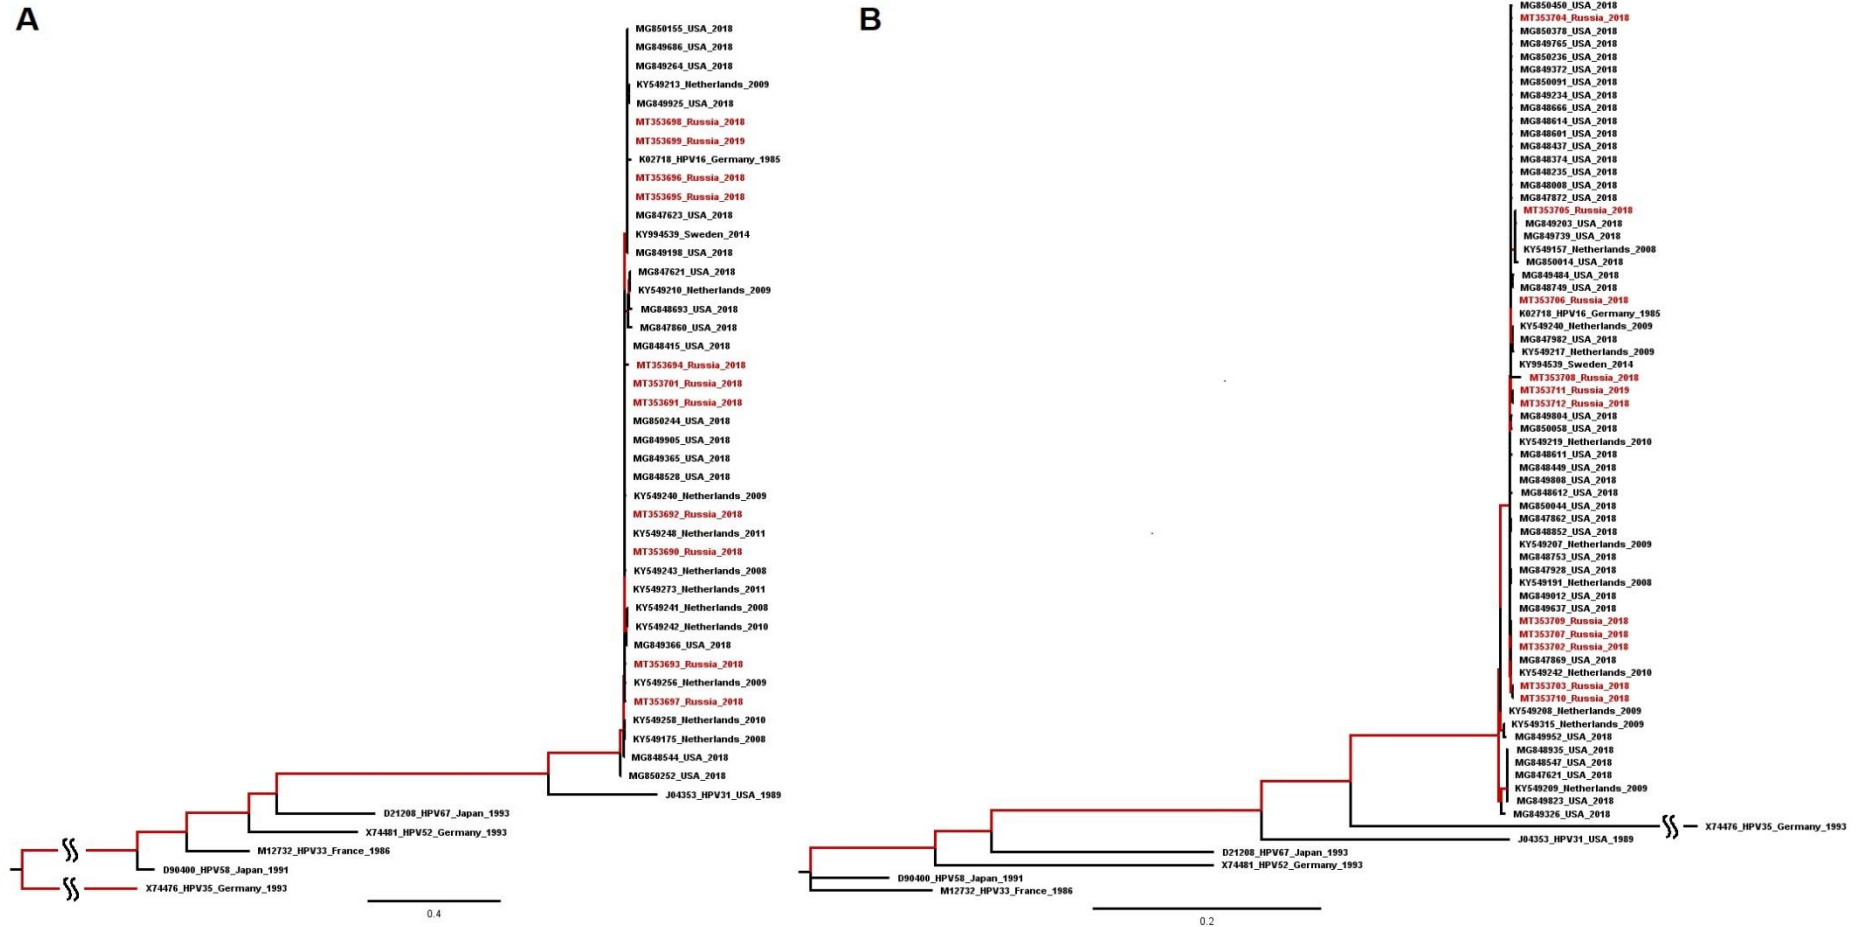

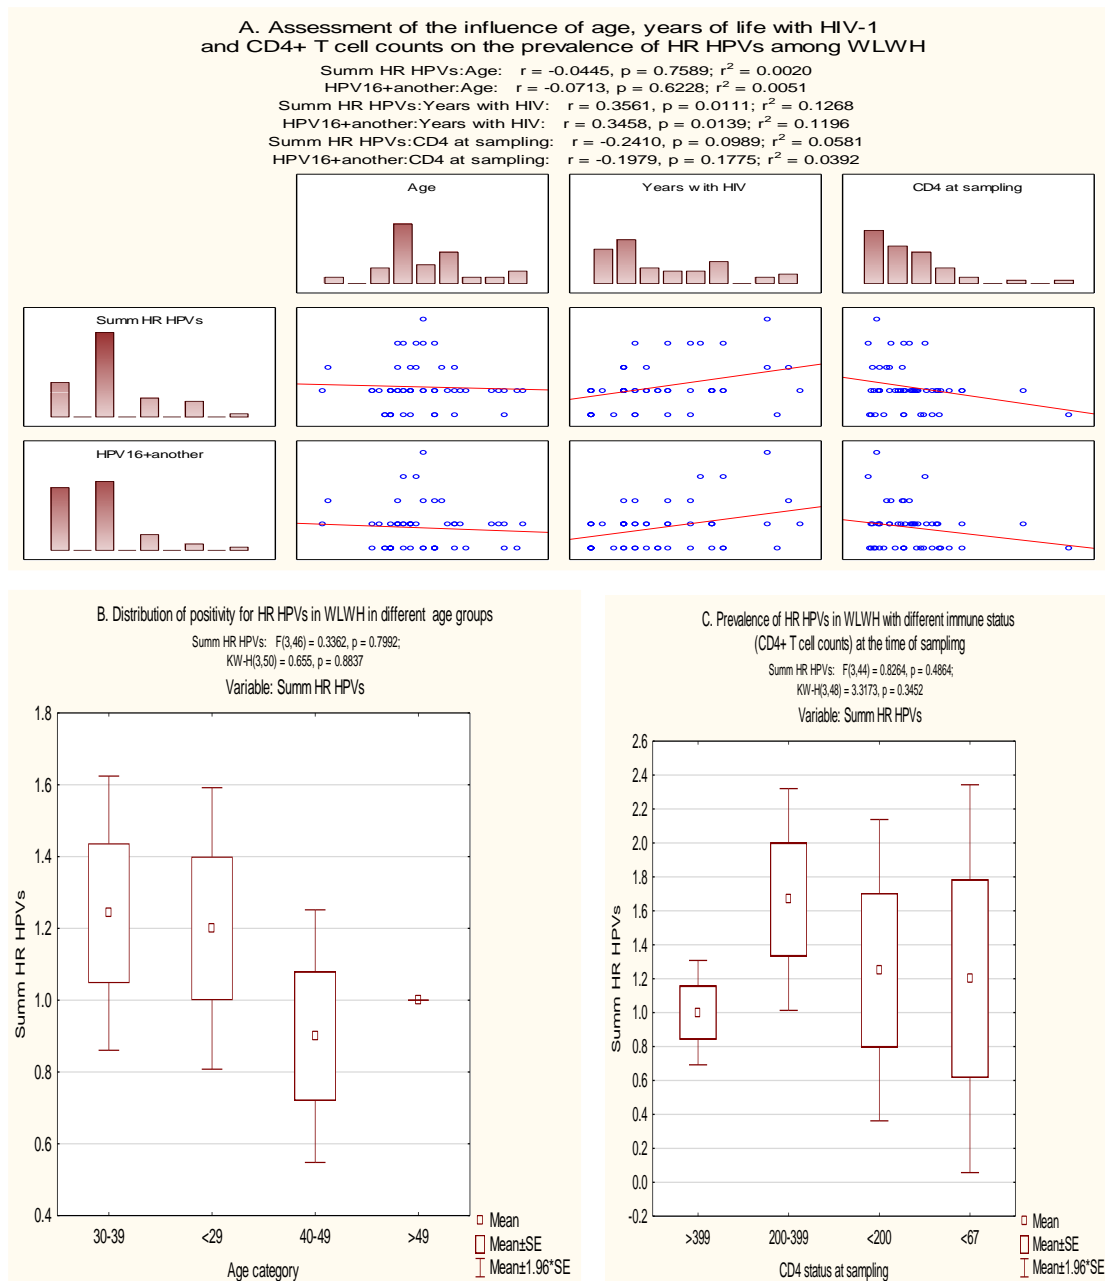

**Supplementary Figure 2. Prevalence of HR HPVs in WLWH without TB (n=50) in relation to the demographic and clinical parameters of the group.** Correlation of HR HPV DNA detected in cervical smears with the duration of life with HIV-1, but not age or CD4+ T cell counts at the time of analysis (A); Number of infecting HR HPV genotypes in different age categories (B); Number of infecting HR HPV genotypes in relation to the immune status of WLWH reflected by CD4+ T cell counts by the time of sampling (C). p values are indicated in the panels, Kruskal Wallis test (Statistica 11).



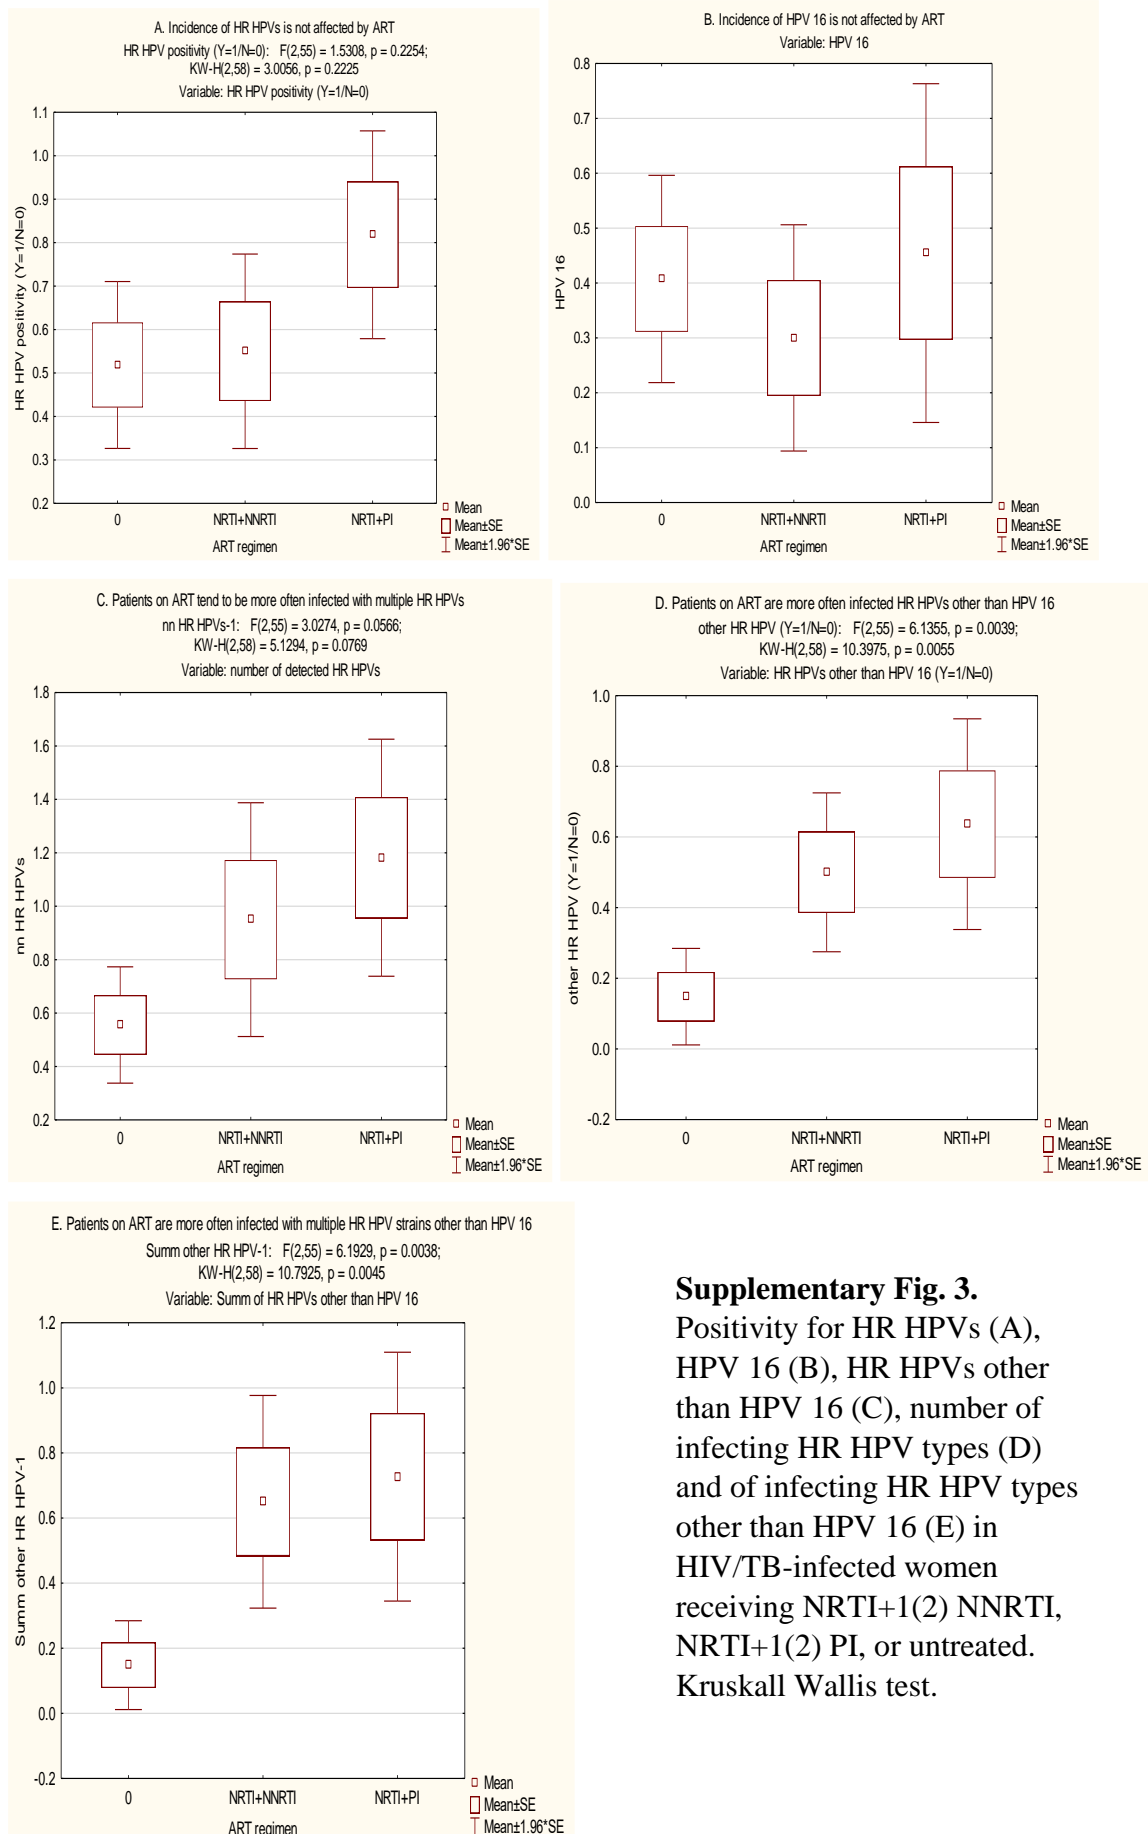

**Supplementary Fig. 3.**  
 Positivity for HR HPVs (A),  
 HPV 16 (B), HR HPVs other  
 than HPV 16 (C), number of  
 infecting HR HPV types (D)  
 and of infecting HR HPV types  
 other than HPV 16 (E) in  
 HIV/TB-infected women  
 receiving NRTI+1(2) NNRTI,  
 NRTI+1(2) PI, or untreated.  
 Kruskal Wallis test.
